# 1 **Non-Invasive Detection of Viral Antibodies Using Oral Flocked**

## 2 **Swabs**

3 **Running Title:** Oral flocked swabs to detect viral antibodies

4 **Word Counts:** Abstract: 173                      Text Body: 3,709

5

6 **David J. Speicher**<sup>1,2,3,4,#</sup>, **Kathy Luinstra**<sup>2</sup>, **Emma J. Smith**<sup>5</sup>, **Santina Castriciano**<sup>6</sup>, **Marek**  
7 **Smieja**<sup>1,2</sup>

8 <sup>1</sup>Department of Pathology & Molecular Medicine, McMaster University, Ontario, Canada

9 <sup>2</sup>Department of Laboratory Medicine, St. Joseph's Healthcare Hamilton, Ontario, Canada

10 <sup>3</sup>Menzies Health Institute Queensland, Griffith University, Queensland, Australia

11 <sup>4</sup>M.G. DeGroot Institute for Infectious Disease Research, Department of Biochemistry and  
12 Biomedical Sciences, DeGroot School of Medicine, McMaster University, Hamilton, Ontario,  
13 Canada

14 <sup>5</sup>Department of Mathematics and Statistics, University of Guelph, Ontario, Canada

15 <sup>6</sup>Copan Italia, Brescia, Italy

16

17 **#Corresponding author:** Dr. David J. Speicher; [speichdj@mcmaster.ca](mailto:speichdj@mcmaster.ca)  
18 Department of Biochemistry & Biomedical Sciences  
19 McMaster University  
20 1200 Main Street West, Room HSC 4N59  
21 Hamilton Ontario L8N 3Z5, Canada  
22 Phone: 905-525-9140 x21663  
23 FAX 905-522-9033  
24

25 **Keywords:** oral flocked swabs, saliva, diagnostics, Cytomegalovirus, Epstein-Barr virus,  
26 Varicella-Zoster virus, Measles, Mumps

## 27 **Highlights**

- 28 • Oral flocked swabs are an easy, self-collection method for measuring viral antibodies.
- 29 • Viral IgG is stable on dried oral flocked swabs for at least two years.
- 30 • Oral swabs are highly sensitive for CMV, VZV, and EBV IgG.
- 31 • Oral swabs are potentially useful for surveillance and clinical microbiology.

## 32 **Abstract**

33 Salivary antibodies are useful in surveillance and vaccination studies. However, low antibody  
34 levels and degradation by endonucleases are problematic. Oral flocked swabs are a potential  
35 non-invasive alternative to blood for detecting viral antibodies. Serum and saliva collected from  
36 50 healthy volunteers were stored at -80°C; dried swabs at room temperature. Seroprevalence  
37 for Cytomegalovirus (CMV), Varicella-Zoster virus (VZV), Epstein-Barr virus (EBV), Measles  
38 and Mumps IgG antibodies were determined using commercial ELISAs and processed on an  
39 automated platform. For each antibody, swabs correlated well with saliva. For CMV IgG, VZV  
40 IgG, and EBV EBNA-1 IgG and VCA IgG, the swab sensitivities compared to serum were  
41 95.8%, 96%, 92.1% and 95.5% respectively. For Measles IgG, swab sensitivity was 84.5%.  
42 Mumps IgG displayed poor sensitivity for oral swabs (60.5%) and saliva (68.2%). Specificities  
43 for IgG antibodies were 100% for CMV, EBV and Mumps. Specificities for VZV and Measles  
44 could not be determined due to seropositive volunteers. As oral flocked swabs correlate well  
45 with serum, are easy to self-collect and stable at room temperature further research is warranted.

## 46 **1. Introduction**

47 Immunological screening for viral antibodies (primarily IgG) in serum to assess past infection or  
48 vaccine immunity is routinely performed via commercial enzyme immunoassays (EIA) on closed  
49 platforms. Serum is the gold standard for determining immune status but is invasive to collect.  
50 Saliva has considerable diagnostic potential: it is non-invasive, abundant, easily collected, and  
51 representative of oral and systemic health. Salivary diagnostics is rapidly emerging, especially  
52 defining biomarkers for point-of-care testing of infectious diseases (1). Salivary antibodies are  
53 primarily secretory IgA from the salivary glands, while IgG and IgM are derived from serum  
54 plasma cells and passively diffused into the oral cavity via gingival crevicular fluid (2, 3).  
55 Salivary IgG (sIgG) is systemically representative and strongly correlates with serum levels, but  
56 loads are approximately 1:800 that of serum (4, 5). This is problematic for typical closed testing  
57 systems that incorporate a 1:100 dilution step. Despite low levels, salivary antibodies are  
58 utilized in the U.S. Food and Drug Administration approved OraQuick ADVANCE<sup>®</sup> Rapid  
59 HIV-1/2 Antibody Test (OraSure Technologies, Inc., USA) and OraQuick<sup>®</sup> HCV Test (OraSure  
60 Technologies, Inc.) (1). However, many commercial assays are cost-prohibitive for resource-  
61 limited settings.

62

63 Saliva collection can be difficult in children and hyposalivators, such as immunocompromised  
64 patients. Salivary endonucleases are detrimental, remaining active at -80°C, necessitating special  
65 handling, or storage in proteolytic stabilizers unsuitable for antibody preservation (6). To  
66 overcome these limitations, procedures for viral antibody detection were optimized on an open  
67 commercial platform for dried oral flocked swabs, after room temperature storage. The  
68 efficiency of oral flocked swabs to detect viral antibodies has yet to be determined. Our method

69 was initially optimized for Cytomegalovirus (CMV) IgG due to its importance in hematopoietic  
70 stem cell, solid organ, and haploidentical transplantations as well as prenatal patients (7, 8). We  
71 then assessed the procedures' potential application to detect Varicella-Zoster virus (VZV),  
72 Epstein-Barr virus (EBV), Measles and Mumps IgG.

73

## 74 **2. Materials and Methods**

### 75 *2.1. Study Population:*

76 Following Hamilton Integrated Research Ethics Board (HiREB #14-658) approval and written  
77 informed consent, two oral swabs, unstimulated saliva, and blood were collected. Optimisation  
78 of pre-analytic and analytic procedures was performed on 10 healthy volunteers with known  
79 CMV seropositivity (5 positive, 5 negative), and expanded to 50 healthy volunteers for the  
80 diagnostic accuracy study. Laboratory staff (15 males:35 females) from St. Joseph's Healthcare  
81 Hamilton with an average age of 43.4 years (range: 18-65 years) voluntarily provided all sample  
82 types, except for one who could not produce a saliva sample. Two oral swabs (FLOQSwabs®  
83 #520C, Copan Italia S.p.A., Brescia, Italy) were collected consecutively by moistening the  
84 flocked swab on the tongue and then rotating between the gums and cheek three to five times.  
85 Swabs were then dried for an hour inside a biosafety cabinet and stored inverted in a  
86 microcentrifuge tube at room temperature prior to elution and at -20°C following elution. Whilst  
87 circadian rhythm was not accounted for as swabs were collected at times convenient for the  
88 volunteer, participants were asked to refrain from eating or drinking 60-minutes prior to  
89 collection. Cell-free unstimulated saliva was collected by expectorating 2-5mL into a sterile  
90 50mL Falcon tube, centrifuging at 2,800  $x$  g for 10-minutes and aspirating the supernatant (9).

91 Supernatant was aliquoted into 1mL portions and stored at -80C; the cell pellet was discarded.  
92 Serum was obtained from a 5mL blood collection via venipuncture, allowed to clot, centrifuged  
93 at 3,000  $x$  g for 10-minutes, and stored at -80°C.

94

## 95 ***2.2. Development and Optimisation of pre-analytic and analytic procedures:***

96 The first optimisation to determine the optimal dilution for testing oral swabs was performed  
97 with a CMV IgG EIA on the ThunderBolt<sup>®</sup> ELISA Analyzer; both from Gold Standard  
98 Diagnostics (GSDx, Davis, CA, USA). To elute viral antibodies, 250µL PBS was added to a  
99 dried swab head, vortexed for 30-seconds, incubated at room temperature for 10-minutes, and  
100 centrifuged at 14,000  $x$  g for one minute, before discarding the swab. Serial dilutions (2-fold  
101 serially from neat to 1:16) were prepared in PBS and 100µL tested on the ThunderBolt<sup>®</sup> ELISA  
102 Analyzer as per manufacturer's instructions. Repeated measures one-way ANOVA was  
103 performed in R3.5.0 in combination with polynomial contrasts to assess the nature and  
104 significance of the relationship between dilutions and optical density (O.D.) values (10).

105

106 The second optimisation determined the effect of tube shape and elution volume on O.D. values  
107 and status. Various volumes of PBS (150µL, 200µL, and 250µL) were added to swabs stored in  
108 two shapes of microcentrifuge tubes: 2.0mL flat-bottomed, screw cap tubes (SCT-200-Y,  
109 Axygen Scientific, Union City, CA, USA) and 1.5mL conical microcentrifuge tubes (MCT-150-  
110 C, Axygen Scientific). The volume of PBS recovered was measured for each. To assess the  
111 relationship between O.D. values and both tube shape and volume, a linear mixed effects model  
112 was fit. O.D. values were treated as the response and volume added and tube type were

113 considered as the main effects. As sample manipulations could affect positivity only positive  
114 patients were considered.

115

116 The third optimization determined the effect pelleted buccal cells had on O.D. values and  
117 positivity of five salivopositive and five salivonegative samples using three methods: 1. Pellet,  
118 measuring the supernatant O.D. values with undisturbed pelleted buccal cells at the bottom of the  
119 tube; 2. Supernatant, measuring the supernatant O.D. values after transfer to a new tube without  
120 disturbing the pellet; 3. Resuspended; measuring the O.D. values after complete resuspension of  
121 the buccal cells. To determine the relationship between resuspension methods, an initial  
122 ANOVA followed by paired testing was used. Further pairwise comparisons between O.D.  
123 values of the three methods (pellet, supernatant, and resuspended) were constructed using paired  
124 t-tests.

125

126 The fourth optimisation determined the stability of viral antibodies in dried flocced swabs over  
127 time by measuring O.D. values from five salivopositive samples at baseline and after two months  
128 stored at room temperature. Paired t-tests were used to compare average O.D. values at both  
129 time points.

130

### 131 ***2.3. Diagnostic Accuracy Study***

132 A cross-sectional diagnostic accuracy study was performed to compare oral flocced swabs and  
133 unstimulated saliva versus serum as a reference standard, for the detection of various viral-  
134 specific IgG antibodies. As results were similar between two consecutively collected swabs

135 (data not shown) swab eluates were pooled to facilitate automated testing of multiple analytes.  
136 The assays utilized included: CMV IgG EIA, EBV EBNA IgG EIA, EBV VCA IgG EIA,  
137 Measles IgG EIA, and Mumps IgG EIA from GSDx; RIDASCREEN<sup>®</sup> VZV IgG (K5621),  
138 RIDASCREEN<sup>®</sup> Measles IgG (K5421), and RIDASCREEN<sup>®</sup> Mumps IgG (K5521) from R-  
139 Biopharm AG (Darmstadt, Germany). These commercial EIAs are optimised for serum but were  
140 used off-label for oral fluids. All assays were performed as per manufacturer's protocol using  
141 100 $\mu$ L 1:100 sera, but 100 $\mu$ L undiluted oral fluid. For each assay, the mean O.D. and standard  
142 deviation (SD) were calculated from swabs and saliva specimens corresponding to "true-  
143 negative" subjects, i.e. serum test negative subjects. We then defined cut-off values as: Non-  
144 reactive if less than two SDs above the average O.D. values; Reactive if greater than 3 SDs  
145 above the average O.D.; all other O.D. values considered indeterminate. As all samples were  
146 seropositive for VZV and measles the cut-off O.D. values for these analytes were extrapolated  
147 from the cut-off O.D. values of other assays from the same manufacturer. For each, the  
148 diagnostic test accuracy (sensitivity, specificity, positive predictive value (PPV), negative  
149 predictive value (NPV), and overall accuracy), and misclassification rates were determined.  
150 Kappa statistics were calculated in a pairwise fashion to quantify the agreement beyond chance  
151 between oral swabs, unstimulated saliva, and serum for all antibodies of interest.

152

### 153 **3. Results**

#### 154 ***3.1. Optimisation of pre-analytic procedures:***

155 To determine the effect of sample dilutions, O.D. values were measured at five, two-fold dilution  
156 points. Dilutions significantly decrease O.D. values ( $p=0.013$ ) and affected positivity: 4-fold and



157 8-fold dilutions yielded 2/5 (40%) and 4/5 (80%) false non-reactive samples, respectively  
158 (Figure 1). Pairwise comparison showed that dilutions significantly decreased O.D. values in a  
159 linear relationship ( $F=17.758$ ,  $p=0.014$ ). Therefore, swabs were used undiluted to ensure that  
160 weakly reactive samples did not become falsely non-reactive.

161

162 To determine the effect of tube shape and establish the optimal elution volume, O.D. values were  
163 measured at three volumes of PBS and two tube shape combinations. The conical tube shape  
164 caused eluate to be reabsorbed by the swab, significantly reduced recovery volume (conical vs  
165 flat-bottomed:  $60.66 \pm 4.38\%$  vs  $98.63 \pm 0.78\%$ ;  $p=0.017$ ), O.D. values ( $p=0.003$ ), and  
166 potentially affected the positivity of weakly reactive samples (Figure 2). The O.D. values  
167 slightly decreased with increased volume added (150 $\mu$ L to 250 $\mu$ L), but this difference was not  
168 significant ( $p=0.184$ ) and did not affect positivity. In the non-reactive samples, the average O.D.  
169 values of the flat-bottomed tubes ( $0.080 \pm 0.008$ ) were slightly higher than the conical tubes  
170 ( $0.059 \pm 0.021$ ), but this difference was not significant ( $p=0.323$ ). Therefore, subsequent testing  
171 was performed by eluting with 250 $\mu$ L PBS in flat-bottomed tubes to facilitate two tests per swab.

172

173 To determine the most efficient sample handling procedure to yield the highest O.D. values,  
174 three methods were evaluated. In the reactive samples, there was little difference between the  
175 O.D. values: undisturbed pellet ( $0.688 \pm 0.434$ ); supernatant ( $0.545 \pm 0.222$ ); resuspended pellet  
176 ( $0.531 \pm 0.214$ ). One sample was a weak reactive in the pellet method (O.D. 0.258) but became  
177 indeterminate in the supernatant (O.D. 0.214) and resuspended pellet (O.D. 0.197) method.  
178 Pairwise comparison revealed no significant differences in O.D. values between the sample

179 handing methods (pellet:supernatant,  $p=0.312$ ; pellet:resuspended,  $p=0.288$ ;  
180 supernatant:resuspended,  $p=0.515$ ), but fractioning the sample could produce an indeterminate  
181 result from a weakly reactive sample and was more labour intensive. Therefore, subsequent  
182 testing was performed using the whole sample following centrifugation.

183

184 To determine the stability of oral swab collections at room temperature, O.D. values were  
185 measured from dried oral swabs the day of collection and after two months of storage at room  
186 temperature. The average O.D. value did not significantly differ between baseline (O.D.  $0.575 \pm$   
187  $0.284$ ) and two months (O.D.  $0.568 \pm 0.188$ ). The mean difference in O.D. values was  $0.008$   
188 ( $p=0.946$ ). No change in salivopositivity was observed.

189

### 190 **3.2. Diagnostic Accuracy Study**

191 To determine the correlation between oral flocced swabs, unstimulated saliva and serum a cross-  
192 sectional diagnostic accuracy study was conducted on 50 volunteers for CMV, VZV, EBV  
193 EBNA-1 and VCA, Measles, and Mumps IgG. For CMV IgG, the seropositivity using serum  
194 was 24/50 (48.0%). The cut-off O.D. values for swabs and saliva were non-reactive  $<0.179$  and  
195 reactive  $>0.221$ ; and non-reactive  $<0.220$  and reactive  $>0.253$ , respectively (Table 1). Using the  
196 new cut-off O.D. values the sensitivity of swabs and saliva were 23/24 (95.8%; 95% CI: 78.1%,  
197 100%) and 24/24 (100%; 95% CI: 83.7%, 100%), respectively (Table 2). Specificity of both  
198 swabs and saliva were 100%. One swab was indeterminate. The agreement beyond chance was  
199 very good between oral swabs and both serum ( $K=0.88$ ; 95% CI: 0.76, 1.000) and saliva

200 (K=0.85; 95% CI: 0.71, 1.00), and perfect between saliva and serum (K=1.00; 95% CI: 0.86,  
201 1.00) (Figure 3).

202

203 For VZV IgG, all participants were seropositive. There was excellent correlation between both  
204 swabs and saliva to serum: 48/50 (96.0%; 95% CI: 85.7%, 99.7%) and 46/49 (93.9%; 95% CI:  
205 82.9%, 98.5%), respectively. As there were no seronegative participants specificity could not be  
206 determined and Cohen's kappa coefficient was poor for both sera to swab and saliva (K=0), and  
207 fair for swabs vs saliva (K=0.37; 95% CI: -0.189, 0.928).

208

209 For EBV, fewer participants were seropositive for EBNA-1 IgG than VCA IgG: 38/50 (76.0%)  
210 and 44/50 (88.0%), respectively. The sensitivity of swabs and saliva were comparable for both  
211 EBNA-1 IgG [swabs: 35/38 (92.1%; 95% CI: 78.5%, 98.0%); saliva: 34/38 (91.9%; 95% CI:  
212 75.3%, 96.4%)] and VCA IgG [swabs: 42/44 (95.5%; 95% CI: 84.0%, 99.6%); saliva: 42/43  
213 (97.7%; 95% CI: 86.8%, 100%)]. However, sensitivity for the composite measure of EBNA-1  
214 IgG *or* VCA IgG equated to 43/44 (97.7%; 95% CI: 87.1%, 100%) and 44/44 (100%; 95% CI:  
215 90.4%, 100%) for swabs and saliva, respectively. The agreement for EBNA-1 IgG was very  
216 good for both swab (K = 0.85; 95% CI: 0.68, 1.00) and saliva (K=0.85; 95% CI: 0.68, 1.00)  
217 compared to serum, and perfect between swabs and saliva (K=1.000; 95% CI: 0.90, 1.00). The  
218 agreement for VCA IgG was very good for both swab (K=0.83; 95% CI: 0.61, 1.000) and saliva  
219 (K=0.91; 95% CI: 0.74, 1.00) compared to serum, and good between swabs and saliva (K=0.76;  
220 95% CI: 0.50, 1.00).

221

222 For Measles and Mumps IgG the correlation between oral swabs, unstimulated saliva and serum  
223 as well as between two EIAs was determined. For Measles IgG, all participants were  
224 seropositive by both assays. The sensitivity of swabs and saliva was much higher for the GSDx  
225 assays for both swabs [41/48 (85.4%; 95% CI: 72.5%, 93.1%) vs 24/49 (48.9%; 95% CI: 35.6%,  
226 62.5%)] and saliva [46/49 (93.9%; 95% CI: 82.9%, 98.5%) vs 34/49 (69.4%; 95% CI: 55.4%,  
227 80.6%)]. However, the agreement for both assays between swab and saliva compared to sera  
228 was poor (K=0), and poor for swab compared to saliva (GSDx: K=0.24; 95% CI: -0.08, 0.56; R-  
229 Biopharm: K=0.27; 95% CI: -0.09, 0.46). Further analysis showed the R-Biopharm assay had a  
230 much larger misclassification rate for both swab [25/50 (50.0%; 95% CI: 36.6%, 63.4%) vs 5/50  
231 (10.0%; 95% CI: 3.9%, 21.8%)] and saliva [15/49 (30.6%; 95% CI: 19.5%, 44.6%) vs 3/49  
232 (6.1%; 95% CI: 2.1%, 16.5%)], suggesting that the GSDx assay performs better for measuring  
233 measles salivopositivity.

234

235 For Mumps IgG, both assays produced comparable seroprevalence of 45/50 (90.0%) and 46/50  
236 (92.0%) for the GSDx and R-Biopharm assays, respectively. The sensitivity of both assays was  
237 poor for both swabs [GSDx: 26/43 (60.5%; 95% CI: 45.6%, 73.7%); R-Biopharm: 28/45 (62.2%;  
238 95% CI: 47.6%, 74.9%)] and saliva [GSDx: 30/44 (68.2%; 95% CI: 53.4%, 80.1%); R-  
239 Biopharm: 33/45 (73.3%; 95% CI: 58.4%, 84.2%)]. ... (11). The agreement was only fair for  
240 both assays between swab (GSDx: K=0.20; 95% CI: 0.00, 0.40; R-Biopharm: K=0.21; 95% CI:  
241 0.03-0.40) and saliva (GSDx: K=0.25; 95% CI: 0.02, 0.47; R-Biopharm: K=0.32; 95% CI: 0.07,  
242 0.56) compared to sera, as well as swabs compared to saliva (GSDx: K=0.25; 95% CI: 0.03,  
243 0.47; R-Biopharm: K=0.38; 95% CI: 0.16, 0.60). Further analysis showed that both assays had a  
244 large misclassification rate for both swab [GSDx: 18/44 (40.9%; 95% CI: 27.7%, 55.6%); R-

245 Biopharm: 17/45 (37.8%; 95% CI: 25.1%, 52.4%)] and saliva [GSDx: 15/45 (33.3%; 95% CI:  
246 21.3%, 48.0%); R-Biopharm: 12/45 (26.7%; 95% CI: 15.8%, 41.2%)], suggesting that neither  
247 assay is ideal for measuring mumps salivopositivity.

## 248 **4. Discussion**

249 Oral fluids contain IgG profiles highly similar to those in serum for a range of antigens and  
250 diseases regardless of anatomical location (12). Their non-invasive collection is utilized in  
251 several point-of-care assays to detect viral infections and immunity. To avoid degradation by  
252 salivary endonucleases, diagnostic assays either utilize unadulterated gingival crevicular fluid or  
253 whole saliva either chilled immediately following collection and stored frozen or stored in  
254 biological stabilizers (4, 6). Studies for viral IgG utilize the Oracol saliva collection system  
255 (Malvern Medical Developments, UK), which collects 1mL saliva into 1mL transport medium  
256 allowing transportation at room temperature (13, 14). However, as samples must be stored  
257 frozen for long-term preservation this is not ideal for field studies and resource-limited settings  
258 (15). Therefore, as FLOQSwabs<sup>®</sup> are routinely used for bacteriology and molecular  
259 microbiology (16, 17), we developed a simple pre-analytic and analytic method for detecting  
260 viral sIgG on an open commercial platform using dried FLOQSwabs<sup>®</sup> that can be stored at room  
261 temperature for up to 2-months. This was not an epidemiological study, but our method is  
262 applicable to point-of-care or home testing, surveillance, clinical epidemiology and clinical  
263 microbiology.

264

265 Our protocol was developed on a convenient cohort of healthy volunteers and appears promising  
266 as swabs can be self-collected and diagnostic accuracy is comparable to saliva and serum for

267 most viruses tested. The similarity between swabs and saliva is due to cell-free viral IgG  
268 secreted via the gingival crevicular fluid into the mouth and absorbed onto the swab regardless of  
269 oral location swabbed. As swab absorption volume is much lower than the volume of saliva in  
270 the mouth it is possible to collect multiple swabs consecutively at any time of day without a  
271 reduction in positivity. Storing swabs dried maintains sample integrity and restricts activity of  
272 salivary endonucleases for at least 2-months post-collection. Ideally, swabs could be collected  
273 and shipped, but further investigation is needed to assess drying time on sample stability.  
274 Nevertheless, a few procedural steps must be heeded. Whilst cut-off O.D. values vary between  
275 assays, platforms and/or cohort tested, it is essential to elute swabs into flat-bottomed tubes to  
276 prevent reabsorption and then test undiluted eluate. Elution with 250 $\mu$ L PBS permits each  
277 sample to be tested twice. Further work is needed to (i) optimize elution and testing volumes to  
278 maximize testing and increase O.D. values to resolve indeterminate samples, (ii) determine  
279 sample integrity by comparing the absolute amount of human IgG, and (iii) compare manual  
280 testing vs automation to determine the robustness of the protocol.

281  
282 Our swab protocol was initially developed for CMV due to interest from blood banks and  
283 transplant programs. CMV is readily shed in saliva, the viral load is 100-fold higher, and the  
284 limit of detection is 10-fold lower in saliva collected with a sterile swab than urine (18-20).  
285 CMV antibody profiles in serum also strongly correlate with CMV infection and oral shedding  
286 (8, 21, 22), and, based on our study, CMV IgG can be detected accurately in oral swabs. Swabs  
287 displayed similar diagnostic accuracy to saliva and serum. The overall O.D. values in oral fluids  
288 was lower than serum with swabs slightly lower than saliva but displayed a linear comparison in  
289 O.D. values between serum and oral fluids. The slightly lower swab O.D. values compared to

290 saliva results from a fraction of whole saliva diluted in eluate. The one swab that was equivocal  
291 was strongly positive in sera and saliva suggesting further optimisation is warranted. Whilst our  
292 protocol was developed for CMV IgG in healthy volunteers and may not be reflective of assay  
293 performance in hospital or immunocompromised patient populations, it worked well for  
294 herpesviruses due to maintained immunity from latent infections, but less than optimal for  
295 measles and mumps possibly due to waning vaccine-induced immunity.

296  
297 Few publications examined salivary IgG for VZV and EBV. In the only study on VZV IgG in  
298 oral fluids, Talukder *et al.* examined 1,092 participants and reported a sensitivity and specificity  
299 of 93% and 95.7%, respectively (14). The sensitivity is comparable to saliva (93.9%) and swabs  
300 (96.0%) in our study, but our sample size was insufficient to determine assay specificity. In a  
301 hospital laboratory volunteer study, virtually all employees have either received screening and  
302 vaccination for vaccine-preventable illnesses or are old enough to have natural immunity. Based  
303 on the diagnostic accuracy our procedure could be studied as a screening method for preschool  
304 children susceptible to chicken pox.

305  
306 Epidemiological screening for EBV, the aetiological agent of infectious mononucleosis and  
307 nasopharyngeal carcinoma, is performed by screening for EBV VCA IgM, VCA IgG, and  
308 EBNA-1 IgG via IFA or EIAs to distinguish acute from past infection (23). Both Vyse *et al.* and  
309 Crowcroft *et al.* utilized oral fluids to determine EBV immune status (24, 25). Vyse *et al.* used a  
310 'G' antibody capture radioimmunoassay for EBV VCA IgG and reported a sensitivity and  
311 specificity of 93.5% and 100%, respectively (25). Their assay was less sensitive than IFA as

312 samples with a total IgG <2 mg/L yielded false positive reactions due to the monoclonal  
313 antibody binding non-specifically to unsaturated anti-human IgG on the solid phase. Although  
314 we didn't examine the total IgG in our samples, our protocol produced higher sensitivities for  
315 both swabs and saliva with no known false positives. As 5% of people do not produce EBNA-1  
316 IgG after EBV infection we validated both EBV EBNA-1 IgG and VCA IgG (26). Combining  
317 both assays our protocol yielded a sensitivity of 97.7% and 100% for swabs and saliva,  
318 respectively, and may be useful for surveillance studies and could be preferred over serum  
319 heterophile antibody testing for acute infectious mononucleosis work-up.

320

321 As Measles and Mumps are vaccine-preventable infections several studies have used oral fluids  
322 as a non-invasive alternative for monitoring the efficacy of vaccination programs. For Measles  
323 studies have used off-label either the commercialized Measles IgG Capture EIA (Microimmune  
324 Ltd., UK), and the Enzygnost® Anti-Measles Virus/IgG (Siemens Health Care Diagnostics  
325 GmbH, Germany) with mixed results (5). Whilst Hayford *et al.*, reported that oral fluids are not  
326 suitable to detect immunity for Measles due to poor sensitivity (60.2%) and specificity (75.7%)  
327 (27, 28) others reported sensitivity of 90.0-92.0% and a specificity of 77.8-100% using the  
328 Microimmune Ltd. assay (29-32). Our study also produced mixed results between the GSDx and  
329 R-Biopharm assays. Whilst the R-Biopharm assay produced poorly, the GSDx assay was  
330 comparable to the Microimmune Ltd. assay. Further optimization is required to increase the  
331 sensitivity of our assay, but in its present stage may be adequate for epidemiological studies. If  
332 the efficacy of vaccination is essential, confirmatory testing on serum should be performed for  
333 non-reactive oral samples.

334



335 For Mumps, Vainio *et al.*, assessed the Mumps IgG Capture EIA (Microimmune Ltd.) and  
336 reported low detection of Mumps IgG in oral samples (76% sensitivity) and recommended that  
337 the Microimmune assay not be used for surveillance studies (33). In our study, both the GSDx  
338 and R-Biopharm assays produced similarly low sensitivities for both swabs and saliva, but  
339 possibly for different reasons. The R-Biopharm assay produced low O.D. values for both oral  
340 fluids and serum suggestive of an issue with the assay. The GSDx assay yielded a range of O.D.  
341 values for serum similar in range to the other assays, but much lower (<0.5) for swabs. Whilst it  
342 is possible that Mumps IgG is not excreted into the mouth, vaccine-derived immunity to Mumps  
343 also wanes especially into adulthood and maybe too low to detect in oral fluids (34).

344

345 Whilst the use of oral fluids is not novel, we developed a simple non-invasive protocol for  
346 detecting viral IgG using oral flocked swabs. Based on the high sensitivity and excellent  
347 correlation with serum, oral samples are ideal for CMV, EBV, and VZV, adequate for Measles,  
348 but poor for Mumps. As samples can be stored dried for a few months, they are a viable option  
349 for home and field collection. Future work should investigate the utility of oral swabs for viral  
350 IgM as well as Rubella. Studies using oral fluids for Rubella IgM look promising with 79-96.9%  
351 sensitivity and 90-100% specificity (32, 35). Nonetheless, oral swabs appear promising for  
352 surveillance studies, transplant screening programs, and clinical microbiology.

353

## 354 **5. CRediT Author Statement**

355 David J. Speicher: Conceptualization, Investigation, Writing - Original Draft; Kathy Luinstra:  
356 Methodology, Writing - Review & Editing; Emma J. Smith: Formal analysis; Santina  
357 Castriciano: Conceptualization, Resources, Funding acquisition; Marek Smieja: Supervision

358

## 359 **6. Acknowledgements**

360 This study was supported in part by an award from The Research Institute of St. Joe's Hamilton.  
361 We are grateful for the donation of FLOQSwabs<sup>®</sup> (#520C) from Copan Italia, and commercial  
362 EIA kits from Gold Standard Diagnostics and R-Biopharm AG. We thank Gold Standard  
363 Diagnostics for lending the ThunderBolt<sup>®</sup> ELISA Analyzer. This study was based on the initial  
364 CMV IgG testing by Dr Milena Furione and presented at the Clinical Virology Symposium  
365 (CVS 2016; Poster #230). Santina Castriciano is an employee of Copan Italia. The other authors  
366 have no financial or other conflicts of interest to declare. Whilst this manuscript was shared with  
367 Copan Italia and Gold Standard Diagnostics prior to submission these collaborators had no  
368 influence on the data analysis or publication. We are thankful for the support from Jalees Nasir  
369 for the statistical help. We are grateful to the many volunteers at St. Joseph's Healthcare  
370 Hamilton who provided sera, saliva, and oral swabs for testing.

## 371 **7. References**

- 372 1. Khan RS, Khurshid Z, Yahya Ibrahim Asiri F. 2017. Advancing Point-of-Care (PoC)  
373 Testing Using Human Saliva as Liquid Biopsy. *Diagnostics (Basel)* 7.
- 374 2. Brandtzaeg P. 2007. Do salivary antibodies reliably reflect both mucosal and systemic  
375 immunity? *Ann N Y Acad Sci* 1098:288-311.
- 376 3. Parry JV, Perry KR, Mortimer PP. 1987. Sensitive assays for viral antibodies in saliva: an  
377 alternative to tests on serum. *Lancet* 2:72-5.
- 378 4. Saccoccio FM, Gallagher MK, Adler SP, McVoy MA. 2011. Neutralizing activity of  
379 saliva against cytomegalovirus. *Clin Vaccine Immunol* 18:1536-42.
- 380 5. Dimech W, Mulders MN. 2016. A review of testing used in seroprevalence studies on  
381 measles and rubella. *Vaccine* 34:4119-4122.
- 382 6. Speicher DJ, Wanzala P, D'Lima M, Johnson KE, Johnson NW. 2015. Detecting DNA  
383 viruses in oral fluids: evaluation of collection and storage methods. *Diagn Microbiol*  
384 *Infect Dis* 82:120-7.
- 385 7. Ljungman P, Hakki M, Boeckh M. 2011. Cytomegalovirus in hematopoietic stem cell  
386 transplant recipients. *Hematol Oncol Clin North Am* 25:151-69.
- 387 8. Dollard SC, Keyserling H, Radford K, Amin MM, Stowell J, Winter J, Schmid DS,  
388 Cannon MJ, Hyde TB. 2014. Cytomegalovirus viral and antibody correlates in young  
389 children. *BMC Res Notes* 7:776.
- 390 9. Henson BS, Wong DT. 2010. Collection, storage, and processing of saliva samples for  
391 downstream molecular applications. *Methods Mol Biol* 666:21-30.
- 392 10. R Core Team. 2018. R: A language and environment for statistical computing., R  
393 Foundation for Statistical Computing, Vienna, Austria. <https://www.R-project.org/>.

- 394 11. Upper D. 1974. The unsuccessful self-treatment of a case of "writer's block". *J Appl*  
395 *Behav Anal* 7:497.
- 396 12. Hettegger P, Huber J, Passecker K, Soldo R, Kegler U, Nohammer C, Weinhausel A.  
397 2019. High similarity of IgG antibody profiles in blood and saliva opens opportunities for  
398 saliva based serology. *PLoS One* 14:e0218456.
- 399 13. Furuta Y, Ohtani F, Aizawa H, Fukuda S, Kawabata H, Bergstrom T. 2005. Varicella-  
400 zoster virus reactivation is an important cause of acute peripheral facial paralysis in  
401 children. *Pediatr Infect Dis J* 24:97-101.
- 402 14. Talukder Y, Gopal R, Andrews N, Glenn M, Breuer J, Brown D. 2005. Development and  
403 evaluation of Varicella zoster virus ELISA for oral fluid suitable for epidemiological  
404 studies. *J Virol Methods* 128:162-7.
- 405 15. Rosenbaum S, Gettler LT, McDade TW, Belarmino NM, Kuzawa CW. 2018. The effects  
406 of collection and storage conditions in the field on salivary testosterone, cortisol, and  
407 sIgA values. *Ann Hum Biol* 45:428-434.
- 408 16. Coorevits L, Vanscheeuwijck C, Traen A, Binge L, Ryckaert I, Padalko E. 2015.  
409 Evaluation of Copan FLOQSwab for the molecular detection of *Chlamydia trachomatis*  
410 by Abbott RealTime CT PCR. *Acta Clin Belg* 70:398-402.
- 411 17. Larios OE, Coleman BL, Drews SJ, Mazzulli T, Borgundvaag B, Green K, Group ST-FS,  
412 McGeer AJ. 2011. Self-collected mid-turbinate swabs for the detection of respiratory  
413 viruses in adults with acute respiratory illnesses. *PLoS One* 6:e21335.
- 414 18. Cannon MJ, Stowell JD, Clark R, Dollard PR, Johnson D, Mask K, Stover C, Wu K,  
415 Amin M, Hendley W, Guo J, Schmid DS, Dollard SC. 2014. Repeated measures study of

- 416 weekly and daily cytomegalovirus shedding patterns in saliva and urine of healthy  
417 cytomegalovirus-seropositive children. *BMC Infect Dis* 14:569.
- 418 19. Barkai G, Ari-Even Roth D, Barzilai A, Tepperberg-Oikawa M, Mendelson E,  
419 Hildesheimer M, Kuint J. 2014. Universal neonatal cytomegalovirus screening using  
420 saliva - report of clinical experience. *J Clin Virol* 60:361-6.
- 421 20. Stowell JD, Mask K, Amin M, Clark R, Levis D, Hendley W, Lanzieri TM, Dollard SC,  
422 Cannon MJ. 2014. Cross-sectional study of cytomegalovirus shedding and  
423 immunological markers among seropositive children and their mothers. *BMC Infect Dis*  
424 14:568.
- 425 21. Cardoso ES, Jesus BL, Gomes LG, Sousa SM, Gadelha SR, Marin LJ. 2015. The use of  
426 saliva as a practical and feasible alternative to urine in large-scale screening for  
427 congenital cytomegalovirus infection increases inclusion and detection rates. *Rev Soc*  
428 *Bras Med Trop* 48:206-7.
- 429 22. Wang JB, Adler SP. 1996. Salivary antibodies to cytomegalovirus (CMV) glycoprotein B  
430 accurately predict CMV infections among preschool children. *J Clin Microbiol* 34:2632-  
431 4.
- 432 23. De Paschale M, Clerici P. 2012. Serological diagnosis of Epstein-Barr virus infection:  
433 Problems and solutions. *World J Virol* 1:31-43.
- 434 24. Crowcroft NS, Vyse A, Brown DW, Strachan DP. 1998. Epidemiology of Epstein-Barr  
435 virus infection in pre-adolescent children: application of a new salivary method in  
436 Edinburgh, Scotland. *J Epidemiol Community Health* 52:101-4.

- 437 25. Vyse AJ, Knowles WA, Cohen BJ, Brown DW. 1997. Detection of IgG antibody to  
438 Epstein-Barr virus viral capsid antigen in saliva by antibody capture radioimmunoassay. *J*  
439 *Virol Methods* 63:93-101.
- 440 26. De Paschale M, Agrappi C, Manco MT, Mirri P, Vigano EF, Clerici P. 2009.  
441 Seroepidemiology of EBV and interpretation of the "isolated VCA IgG" pattern. *J Med*  
442 *Virol* 81:325-31.
- 443 27. Hayford KT, Al-Emran HM, Moss WJ, Shomik MS, Bishai D, Levine OS. 2013.  
444 Validation of an anti-measles virus-specific IgG assay with oral fluid samples for  
445 immunization surveillance in Bangladesh. *J Virol Methods* 193:512-8.
- 446 28. Hayford KT, Shomik MS, Al-Emran HM, Moss WJ, Bishai D, Levine OS. 2013. Measles  
447 vaccination coverage estimates from surveys, clinic records, and immune markers in oral  
448 fluid and blood: a population-based cross-sectional study. *BMC Public Health* 13:1211.
- 449 29. Hutse V, Van Hecke K, De Bruyn R, Samu O, Lernout T, Muyembe JJ, Brochier B.  
450 2010. Oral fluid for the serological and molecular diagnosis of measles. *Int J Infect Dis*  
451 14:e991-7.
- 452 30. Kremer JR, Muller CP. 2005. Evaluation of commercial assay detecting specific  
453 immunoglobulin g in oral fluid for determining measles immunity in vaccinees. *Clin*  
454 *Diagn Lab Immunol* 12:668-70.
- 455 31. Warrener L, Slibinskas R, Chua KB, Nigatu W, Brown KE, Sasnauskas K, Samuel D,  
456 Brown D. 2011. A point-of-care test for measles diagnosis: detection of measles-specific  
457 IgM antibodies and viral nucleic acid. *Bull World Health Organ* 89:675-82.
- 458 32. Nokes DJ, Enquselassie F, Nigatu W, Vyse AJ, Cohen BJ, Brown DW, Cutts FT. 2001.  
459 Has oral fluid the potential to replace serum for the evaluation of population immunity

- 460 levels? A study of measles, rubella and hepatitis B in rural Ethiopia. *Bull World Health*  
461 *Organ* 79:588-95.
- 462 33. Vainio K, Samdal HH, Anestad G, Wedege E, Skutlaberg DH, Bransdal KT, Mundal R,  
463 Aaberge IS. 2008. Detection of measles- and mumps-specific IgG antibodies in paired  
464 serum and oral fluid samples from Norwegian conscripts. *Eur J Clin Microbiol Infect Dis*  
465 27:461-5.
- 466 34. Lewnard JA, Grad YH. 2018. Vaccine waning and mumps re-emergence in the United  
467 States. *Sci Transl Med* 10.
- 468 35. Vijaylakshmi P, Muthukkaruppan VR, Rajasundari A, Korukluoglu G, Nigatu W,  
469 Warrenner LA, Samuel D, Brown DW. 2006. Evaluation of a commercial rubella IgM  
470 assay for use on oral fluid samples for diagnosis and surveillance of congenital rubella  
471 syndrome and postnatal rubella. *J Clin Virol* 37:265-8.
- 472

## 473 **Figures**

474 **Figure 1.** Two-fold dilutions of the swab eluate in PBS with detection for CMV IgG. Dashed  
475 lines indicate the reactive (upper; O.D. = 0.291) and non-reactive (lower; O.D. = 0.222) cut-off  
476 O.D. values.

477  
478 **Figure 2.** Graphical representation showing how flat-bottom (solid circles and line) and conical  
479 (empty circles and dashed line) tube shape affects (A) volume recovered and (B) CMV sIgG  
480 loads.

481  
482 **Figure 3.** Comparison of viral-specific sIgG in paired flocculated swab versus serum samples from  
483 50 healthy volunteers for the following targets: 1. CMV; 2. VZV; 3. EBV; 4. Measles; 5.  
484 Mumps. For EBV both (a) EBNA-1 and (b) VCA were tested. For Measles and Mumps assays  
485 from (a) Gold Standard Diagnostics and (b) R-Biopharm AG were investigated. Positive cut-off  
486 values (dotted blue line) and negative cut-off values (dotted red line) were determined for each  
487 assay.



488 **Tables**

489 **Table 1.** Cut-off O.D. values for viral-specific IgG assays. For each assay the cut-off O.D.  
 490 values were determined as follows from the average O.D. values of all negative samples: Non-  
 491 reactive = O.D. < mean (non-reactive) + 2 St. Dev; Indeterminate = > mean (non-reactive) + 2 St  
 492 Dev but < mean (non-reactive) + 3 St Dev; Reactive = O.D. > mean (non-reactive) + 3 St Dev.

| Target         | Company    | Serum        |          | Flocked Swab |          | Saliva       |          |
|----------------|------------|--------------|----------|--------------|----------|--------------|----------|
|                |            | Non-Reactive | Reactive | Non-Reactive | Reactive | Non-Reactive | Reactive |
| CMV IgG        | GSDx       | 0.222        | 0.291    | 0.178        | 0.221    | 0.219        | 0.253    |
| VZV IgG        | R-Biopharm | 0.220        | 0.420    | 0.100        | 0.116    | 0.087        | 0.091    |
| EBV EBNA-1 IgG | GSDx       | 0.449        | 0.609    | 0.067        | 0.084    | 0.084        | 0.105    |
| EBV VCA IgG    | GSDx       | 0.324        | 0.438    | 0.116        | 0.150    | 0.193        | 0.229    |
| Measles IgG    | R-Biopharm | 0.200        | 0.250    | 0.081        | 0.100    | 0.102        | 0.125    |
| Measles IgG    | GSDx       | 0.275        | 0.400    | 0.101        | 0.116    | 0.115        | 0.135    |
| Mumps IgG      | R-Biopharm | 0.155        | 0.174    | 0.109        | 0.137    | 0.113        | 0.135    |
| Mumps IgG      | GSDx       | 0.532        | 0.635    | 0.086        | 0.108    | 0.112        | 0.13     |

493 GSDx=Gold Standard Diagnostics

494

495 **Table 2.** Diagnostic accuracy for viral-specific IgG assays in swabs and saliva compared to sera. For all samples were seropositive  
 496 for VZV and Measles so the specificity could not be determined.

| Assay                            | Cytomegalovirus |        | Varicella Zoster Virus |        | Epstein-Barr Virus |        |              |        | Measles      |        |               |        | Mumps        |        |               |        |
|----------------------------------|-----------------|--------|------------------------|--------|--------------------|--------|--------------|--------|--------------|--------|---------------|--------|--------------|--------|---------------|--------|
|                                  | GSDx CMV IgG    |        | R-Bio VZV IgG          |        | GSDx EBNA-1 IgG    |        | GSDx VCA IgG |        | GSDx MeV IgG |        | R-Bio MeV IgG |        | GSDx MuV IgG |        | R-Bio MuV IgG |        |
| Specimen                         | Swabs           | Saliva | Swabs                  | Saliva | Swabs              | Saliva | Swabs        | Saliva | Swabs        | Saliva | Swabs         | Saliva | Swabs        | Saliva | Swabs         | Saliva |
| Sample (n=)                      | 50              | 49     | 50                     | 49     | 50                 | 49     | 50           | 49     | 50           | 49     | 50            | 49     | 50           | 49     | 50            | 49     |
| Positives*                       | 23/24           | 24/24  | 48/50                  | 46/49  | 35/38              | 34/38  | 42/44        | 42/44  | 41/50        | 46/50  | 24/50         | 34/50  | 27/45        | 31/45  | 28/46         | 33/46  |
| Sensitivity                      | 95.8%           | 100.0% | 96.0%                  | 93.9%  | 92.1%              | 91.9%  | 95.5%        | 97.7%  | 85.4%        | 93.9%  | 49.0%         | 69.4%  | 60.5%        | 68.2%  | 62.2%         | 73.3%  |
| Specificity                      | 100%            | 100%   | ND                     | ND     | 100%               | 100%   | 100%         | 100%   | ND           | ND     | ND            | ND     | 80.0%        | 80.0%  | 100.0%        | 100.0% |
| PPV                              | 100%            | 100%   | 100%                   | 100%   | 100%               | 100%   | 100%         | 100%   | 100%         | 100%   | 100%          | 100%   | 96.3%        | 96.8%  | 100.0%        | 100.0% |
| NPV                              | 96.3%           | 100%   | ND                     | ND     | 80.0%              | 80.0%  | 75.0%        | 85.7%  | ND           | ND     | ND            | ND     | 19.0%        | 22.2%  | 19.0%         | 25.0%  |
| Accuracy                         | 98.0%           | 100%   | 96.0%                  | 93.9%  | 94.0%              | 93.9%  | 96.0%        | 98.0%  | 85.4%        | 93.9%  | 49.0%         | 69.4%  | 62.5%        | 69.4%  | 65.3%         | 75.5%  |
| Misclassification                | 4.0%            | 0.0%   | 4.0%                   | 6.1%   | 6.0%               | 6.1%   | 4.0%         | 2.0%   | 10.0%        | 6.1%   | 50.0%         | 30.6%  | 40.9%        | 33.3%  | 37.8%         | 26.7%  |
| Agreement (K)                    | 0.88            | 0.85   | 0.00                   | 0.00   | 0.85               | 0.85   | 0.83         | 0.91   | 0.00         | 0.00   | 0.00          | 0.00   | 0.20         | 0.25   | 0.21          | 0.32   |
| Linearity (Adj. R <sup>2</sup> ) | 0.713           | 0.622  | 0.248                  | 0.218  | 0.315              | 0.178  | 0.232        | 0.266  | 0.308        | 0.351  | 0.554         | 0.316  | 0.142        | 0.221  | 0.005         | 0.017  |

497 \*# of swab or saliva positives/# serum positive samples; PPV = Positive Predictive Value; NPV = Negative Predictive Value; GSDx = Gold Standard

498 Diagnostics; R-Bio = R-Biopharm AG; ND = Not Determined.

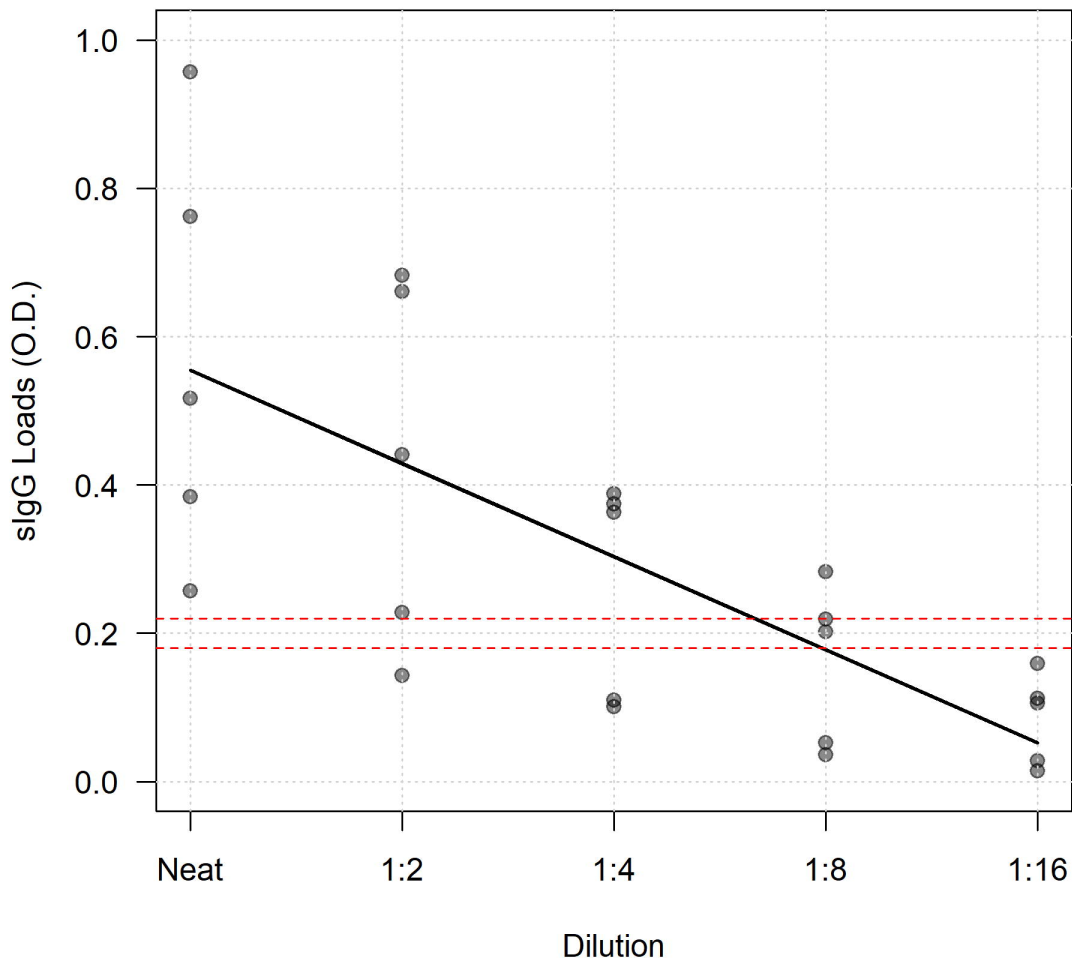

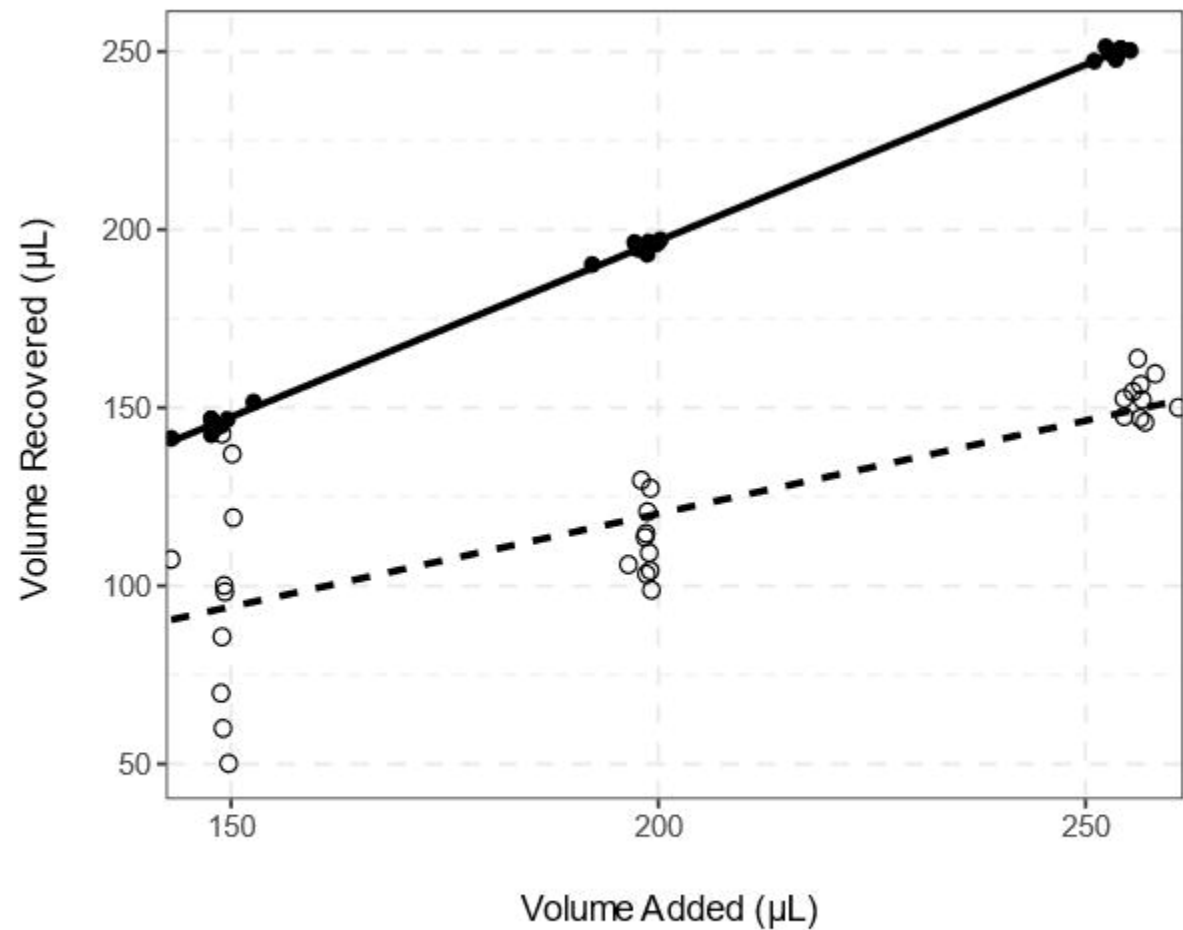

○ Conical ● Flat

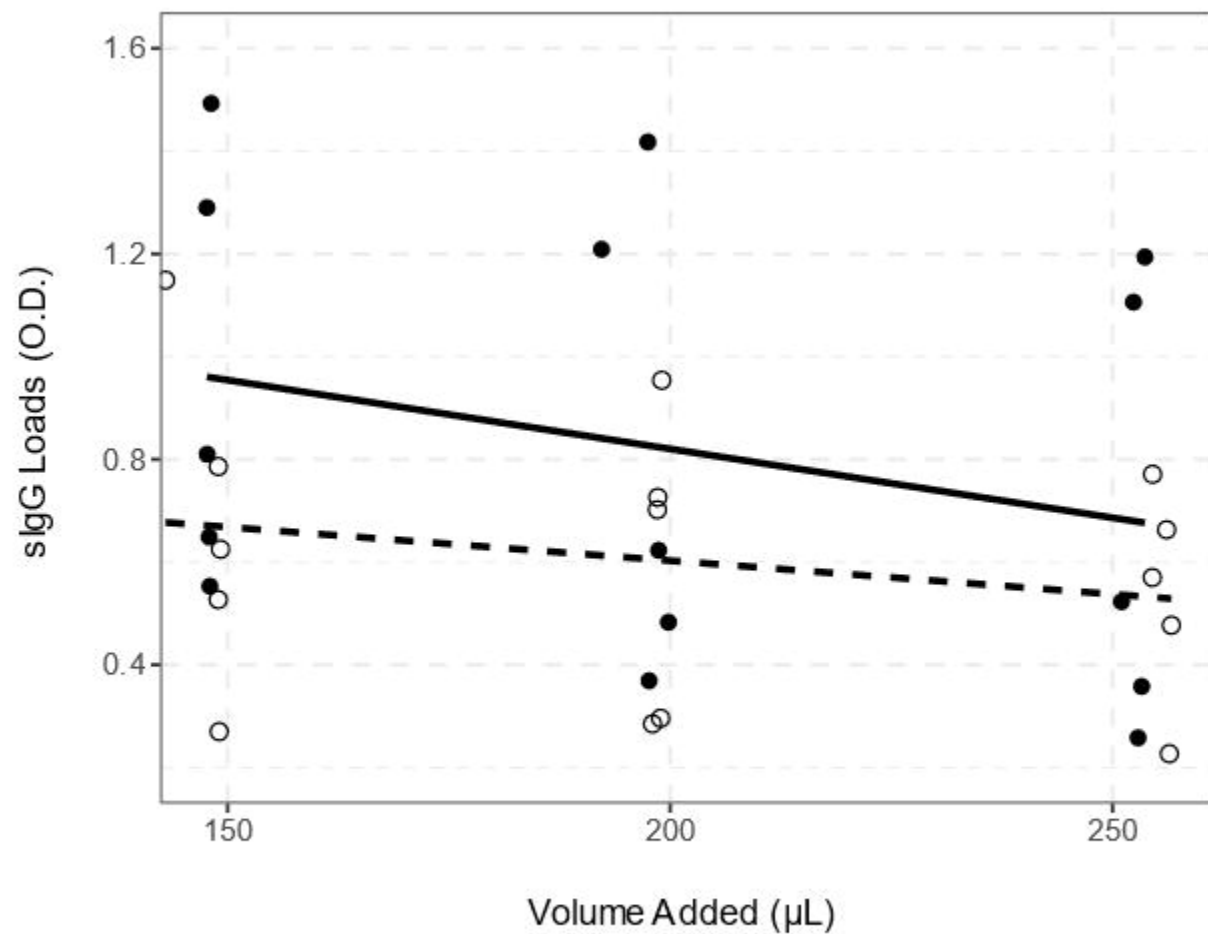

○ Conical ● Flat

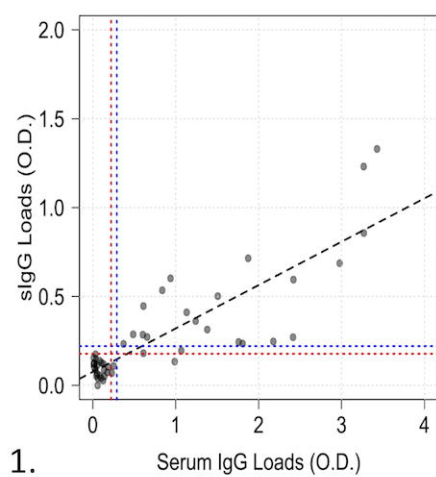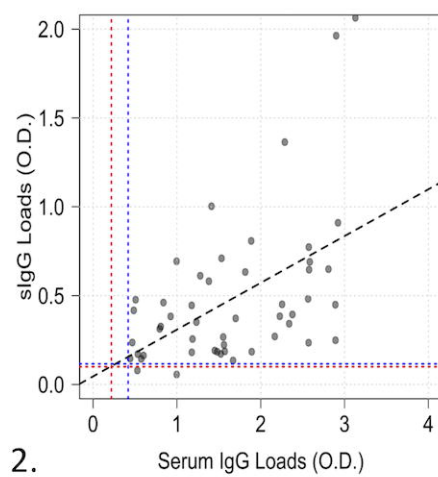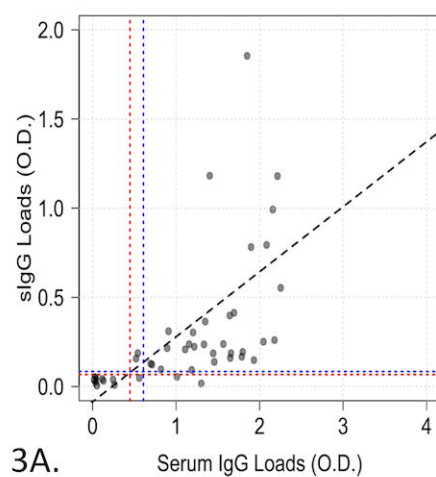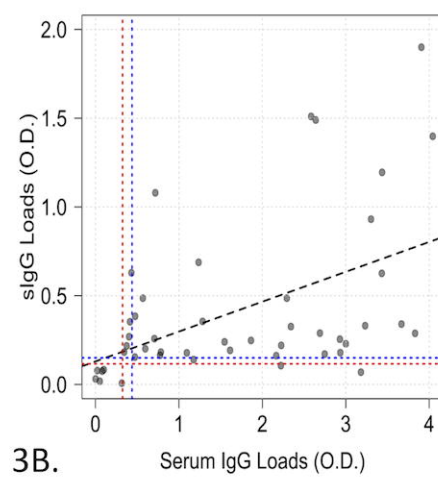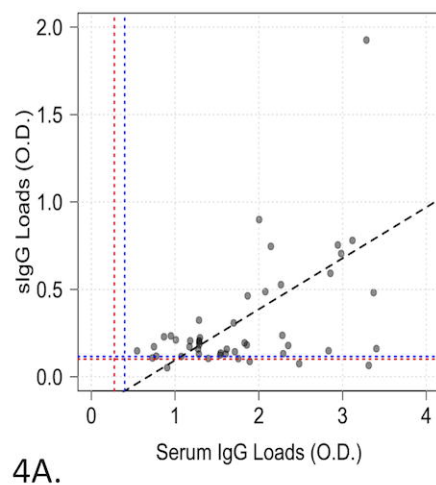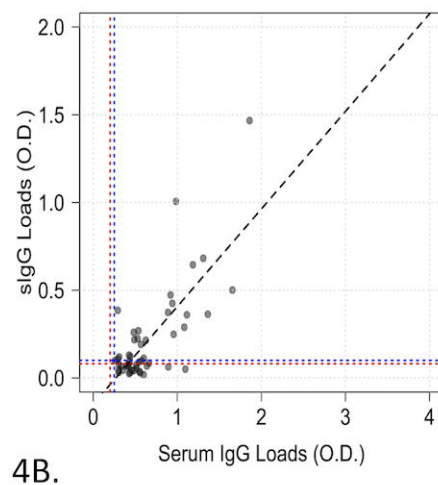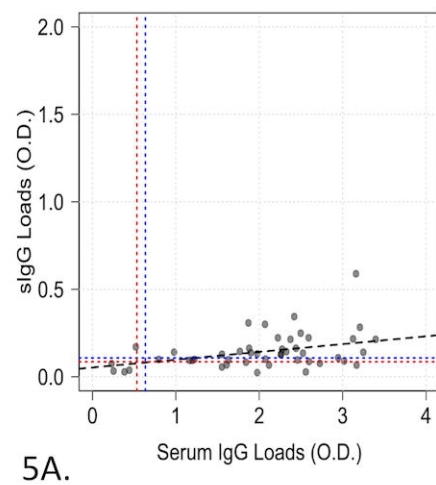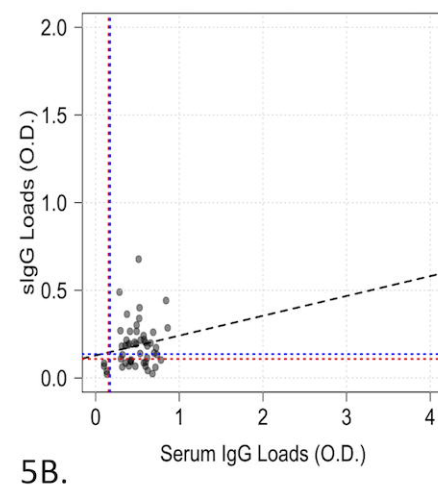

Source: https://www.biorxiv.org/content/10.1101/536227v2.full.pdf
